# Supplementary material for: Randomised cross-over trial evaluating the short-term effects of non-invasive ventilation as an adjunct to airway clearance techniques in adults with cystic fibrosis
Source: PubMed Central journal article supplement — BMJ Open Respir Res. 2019 Apr 14;6(1):e000399. doi: 10.1136/bmjresp-2018-000399 (PMC6530498; doi:10.1136/bmjresp-2018-000399), 2019-04-14
Supplement: bmjresp-2018-000399supp001.pdf [file bmjresp-2018-000399supp001.pdf]

**ARTICLE TITLE – A Randomised Crossover Trial Evaluating the Short-Term Effects of Non-Invasive Ventilation as an Adjunct to Airway Clearance Techniques in Adults with Cystic Fibrosis**

**SUPPLEMENTARY MATERIAL 1**

**Table: Spirometry and oxygen saturations before and after morning and afternoon treatments**

|                                            | <b>NIV Supported ACT (n=14)</b> |                |                       |                | <b>Usual ACT (n=14)</b> |                |                        |                |
|--------------------------------------------|---------------------------------|----------------|-----------------------|----------------|-------------------------|----------------|------------------------|----------------|
|                                            | <b>Baseline</b>                 | <b>Post</b>    | <b>MD (95% CI)</b>    | <b>P value</b> | <b>Baseline</b>         | <b>Post</b>    | <b>MD (95% CI)</b>     | <b>P value</b> |
| <b>Morning Results</b>                     |                                 |                |                       |                |                         |                |                        |                |
| <b>Mean (SD) FEV<sub>1</sub>% pred (%)</b> | 49.0<br>(19.9)                  | 49.2<br>(18.8) | 0.2<br>(-1.9 to 1.4)  | 0.78           | 48.9(20.0)              | 48.4<br>(19.4) | -0.5<br>(-1.1 to 2.1)  | 0.5            |
| <b>Mean (SD) FVC% pred (%)</b>             | 68.1<br>(18.7)                  | 71.9<br>(16.7) | 3.8<br>(-7.7 to 0.1)  | 0.06           | 68.9<br>(18.77)         | 70.3<br>(15.5) | 1.4<br>(-4.3 to 1.5)   | 0.31           |
| <b>Mean (SD) MEF 25% pred (%)</b>          | 34.3<br>(20.9)                  | 33.1<br>(20.5) | -1.1<br>(-1.4 to 3.7) | 0.35           | 31.9 (21.7)             | 33.6<br>(21.2) | -0.6<br>(-1.4 to 2.7)  | 0.51           |
| <b>Mean (SD) MEF 75% pred (%)</b>          | 17.3<br>(10.3)                  | 16.1 (9.2)     | -1.2<br>(-0.9 to 3.3) | 0.24           | 15.4 (8.9)              | 15.9<br>(10.1) | 0.5<br>(-2.0 to 1.0)   | 0.47           |
| <b>Mean (SD) oxygen saturations (%)</b>    | 94.9 (2.7)                      | 93.3 (2.3)     | -0.5<br>(-0.9 to 1.9) | 0.45           | 93.9 (2.8)              | 94.4<br>(2.5)  | 0.5<br>(-1.4 to 0.4)   | 0.26           |
| <b>Afternoon Results</b>                   |                                 |                |                       |                |                         |                |                        |                |
| <b>Mean (SD) FEV<sub>1</sub>% pred (%)</b> | 49.6<br>(18.9)                  | 50.8<br>(19.1) | 1.1<br>(-3.7 to 1.4)  | 0.35           | 48.9<br>(19.2)          | 48.9<br>(18.0) | 0.0<br>(-1.34 to 1.34) | 1              |
| <b>Mean (SD) FVC %pred (%)</b>             | 69.6<br>(16.9)                  | 70.4<br>(16.5) | 0.9<br>(-3.0 to 1.3)  | 0.40           | 71.1<br>(17.6)          | 72.1<br>(16.9) | 1.1<br>(-4.0 to 1.8)   | 0.44           |
| <b>Mean (SD) MEF 25 %pred (%)</b>          | 34.1<br>(22.8)                  | 34.4<br>(23.3) | 0.3<br>(-2.9 to 2.4)  | 0.82           | 34.4<br>(19.9)          | 33.1<br>(20.2) | -1.3<br>(-0.3 to 2.8)  | 0.10           |
| <b>Mean (SD) MEF 75 %pred (%)</b>          | 15.9<br>(10.2)                  | 16.1 (9.4)     | 0.2<br>(-2.8 to 2.4)  | 0.86           | 16.1 (9.6)              | 14.5<br>(7.2)  | -1.6<br>(-0.6 to 3.9)  | 0.13           |
| <b>Mean (SD) oxygen saturations (%)</b>    | 94.9 (2.7)                      | 94.5 (2.7)     | -0.4<br>(-0.3 to 1.1) | 0.29           | 94.3 (2.4)              | 94.0<br>(3.0)  | -0.3<br>(-0.7 to 1.3)  | 0.56           |
