# Supplementary material for: Randomised cross-over trial evaluating the short-term effects of non-invasive ventilation as an adjunct to airway clearance techniques in adults with cystic fibrosis
Source: PubMed Central journal article supplement — BMJ Open Respir Res. 2019 Apr 14;6(1):e000399. doi: 10.1136/bmjresp-2018-000399 (PMC6530498; doi:10.1136/bmjresp-2018-000399), 2019-04-14
Supplement: bmjresp-2018-000399supp002.pdf [file bmjresp-2018-000399supp002.pdf]

**Supplementary Material 2 - Patient Satisfaction Questionnaire**

**How easy was it to clear your chest using this technique?**

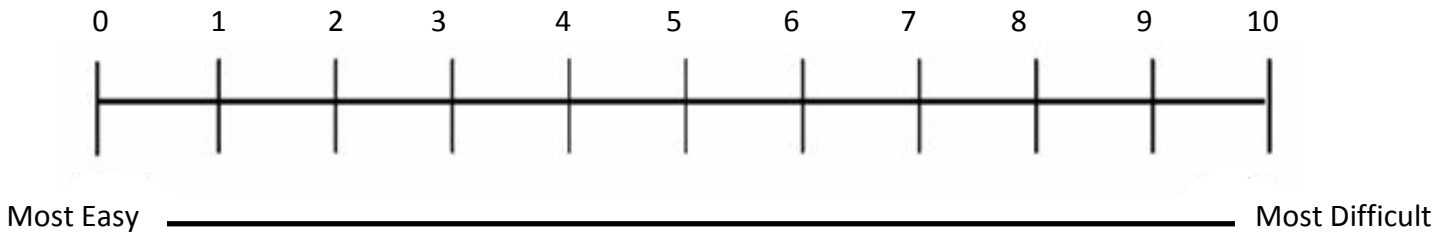

**How breathless did you feel during your session using this technique?**

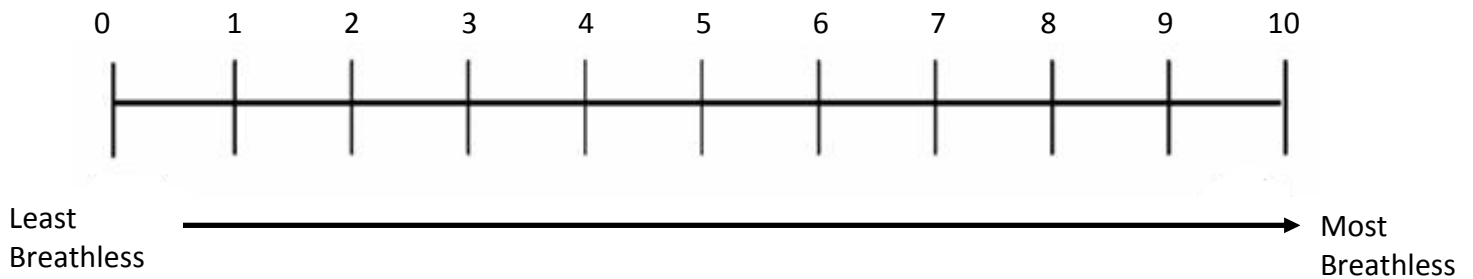

**How tired did you feel during your physiotherapy session?**

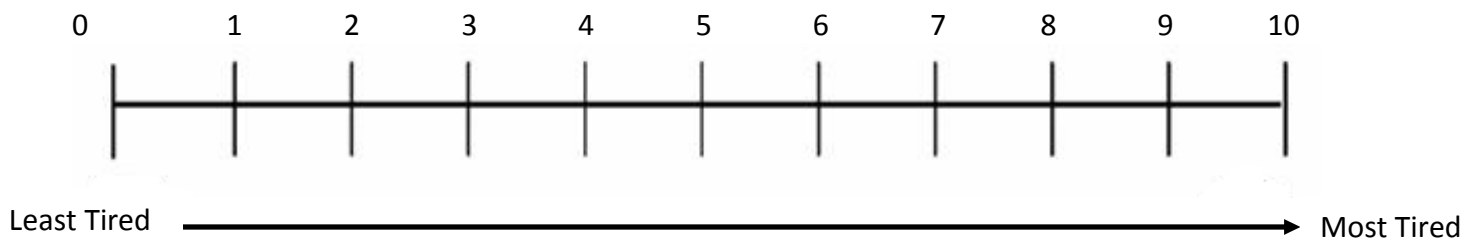

**How Comfortable did you find this technique?**

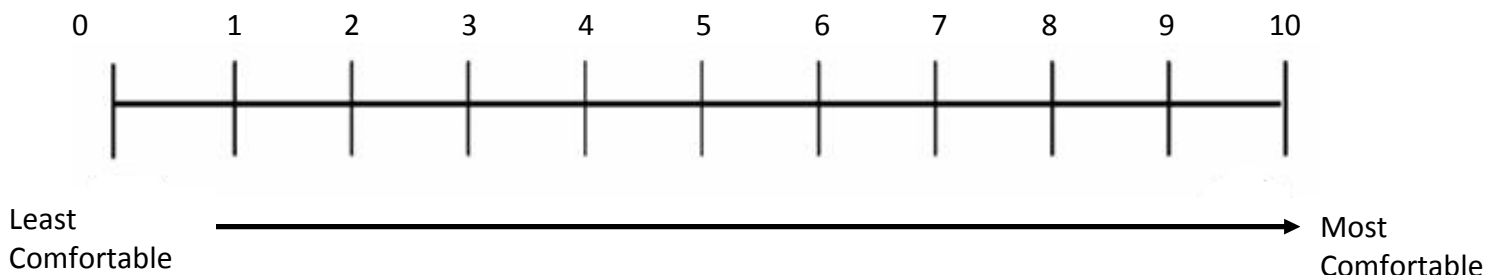

**What difference do you think this technique had to your sputum clearance?**

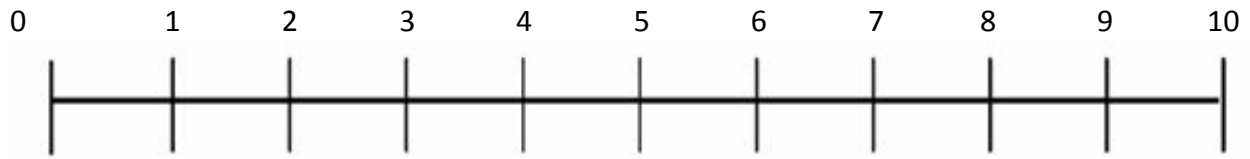

No  
Difference

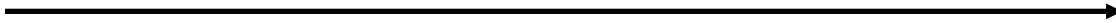

Most  
Difference

**How would you score this technique overall?**

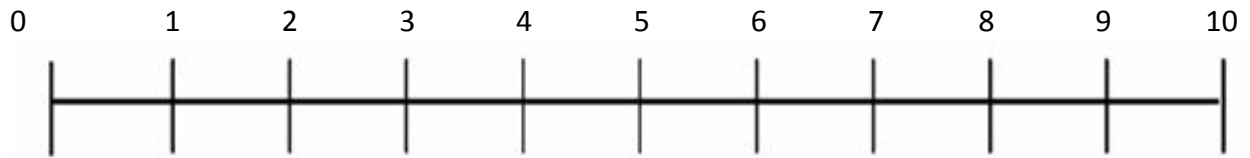

Worst Score

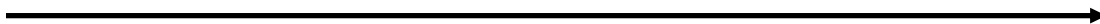

Best score
