# Supplementary material for: Randomised cross-over trial evaluating the short-term effects of non-invasive ventilation as an adjunct to airway clearance techniques in adults with cystic fibrosis
Source: PubMed Central journal article supplement — BMJ Open Respir Res. 2019 Apr 14;6(1):e000399. doi: 10.1136/bmjresp-2018-000399 (PMC6530498; doi:10.1136/bmjresp-2018-000399), 2019-04-14
Supplement: bmjresp-2018-000399supp003.pdf [file bmjresp-2018-000399supp003.pdf]

**ARTICLE TITLE – A Randomised Crossover Trial Evaluating the Short-Term Effects of Non-Invasive Ventilation as an Adjunct to Airway Clearance Techniques in Adults with Cystic Fibrosis**

**Supplementary Material 3 – Patient Preference Questionnaire**

1. a) What was your preferred physiotherapy technique (Usual physiotherapy or using NIV?)

---

b) Why was this your preferred physiotherapy technique?

---

---

---

---

2. If you prefer using NIV to your usual physiotherapy technique, what do you think this adds to your current physiotherapy regime?

---

---

---

---

3. If you prefer your current regime to using NIV with physiotherapy, why is this?

---

---

---

---

4. a) Which technique (using NIV or your usual physiotherapy) do you think cleared the most sputum?

---

b) Why do you think it cleared the most sputum?

---

---

---

---

5. Any other comments?

---

---

---

---
